# Supplementary material for: Eliminating hepatitis C on the Balearic Islands, Spain: a protocol for an intervention study to test and link people who use drugs to treatment and care
Source: PubMed Central journal article supplement — BMJ Open. 2021 Oct 21;11(10):e053394. doi: 10.1136/bmjopen-2021-053394 (PMC8532552; doi:10.1136/bmjopen-2021-053394), 2021-10-21
Supplement: bmjopen-2021-053394.reviewer_comments.pdf [file bmjopen-2021-053394.reviewer_comments.pdf]

## PEER REVIEW HISTORY

BMJ Open publishes all reviews undertaken for accepted manuscripts. Reviewers are asked to complete a checklist review form (<http://bmjopen.bmj.com/site/about/resources/checklist.pdf>) and are provided with free text boxes to elaborate on their assessment. These free text comments are reproduced below.

### ARTICLE DETAILS

|                            |                                                                                                                                                                                                                                 |
|----------------------------|---------------------------------------------------------------------------------------------------------------------------------------------------------------------------------------------------------------------------------|
| <b>TITLE (PROVISIONAL)</b> | Eliminating hepatitis C on the Balearic Islands, Spain: a protocol for an intervention study to test and link people who use drugs to care                                                                                      |
| <b>AUTHORS</b>             | Lazarus, Jeffrey; Herranz, Andrea; Picchio, Camila; Villota-Rivas, Marcela; Rodríguez, Antonia; Alonso, Juan Manuel; Moratinos, Albert; Perrotta, Antonella; Tegeo, Elisabet; Bibiloni, Francisca; Buti, MARIA; Vilella, Àngels |

### VERSION 1 – REVIEW

|                        |                                                           |
|------------------------|-----------------------------------------------------------|
| <b>REVIEWER</b>        | Irving, William<br>University of Nottingham, Microbiology |
| <b>REVIEW RETURNED</b> | 16-Jul-2021                                               |

|                         |                                                                                                                                                                                                             |
|-------------------------|-------------------------------------------------------------------------------------------------------------------------------------------------------------------------------------------------------------|
| <b>GENERAL COMMENTS</b> | This is an excellent study addressing an important issue for a group of patients who are usually underserved.<br>I have no substantive comments on the protocol as described but have a couple of comments: |
|-------------------------|-------------------------------------------------------------------------------------------------------------------------------------------------------------------------------------------------------------|

|                        |                                                                                                       |
|------------------------|-------------------------------------------------------------------------------------------------------|
| <b>REVIEWER</b>        | Dillon, John<br>University of Dundee Division of Cardiovascular and Diabetes<br>Medicine, Liver Group |
| <b>REVIEW RETURNED</b> | 31-Aug-2021                                                                                           |

|                         |                                                                                                                                                                                    |
|-------------------------|------------------------------------------------------------------------------------------------------------------------------------------------------------------------------------|
| <b>GENERAL COMMENTS</b> | This protocol adequately describes a cohort study to validate the approach of multiple micro-elimination interventions to achieve HCV elimination in a defined geographical region |
|-------------------------|------------------------------------------------------------------------------------------------------------------------------------------------------------------------------------|

### VERSION 1 – AUTHOR RESPONSE

Reviewer #1:

Comment: This is an excellent study addressing an important issue for a group of patients who are usually underserved. I have no substantive comments on the protocol as described but have a couple of comments: [Editor's note: no other comments were received.]

Response: Thank you very much for your positive comment. We hope this work will make an important and lasting contribution to the field.

Reviewer #2:

Comment: This protocol adequately describes a cohort study to validate the approach of multiple micro-elimination interventions to achieve HCV elimination in a defined geographical region.

Response: Thank you very much for your positive comment.
